# Supplementary material for: Evaluating the Cost-Effectiveness of Pre-Exposure Prophylaxis (PrEP) and Its Impact on HIV-1 Transmission in South Africa
Source: PLoS One. 2010 Nov 5;5(11):e13646. doi: 10.1371/journal.pone.0013646 (PMC2974638; doi:10.1371/journal.pone.0013646)
Supplement: Text S1 — Mathematical model: equations and parameter values. (0.08 MB PDF) [file pone.0013646.s001.pdf]

# Supplementary material for: Evaluating the cost-effectiveness of pre-exposure prophylaxis (PrEP) and its impact on HIV-1 transmission in South Africa

Carel Pretorius<sup>1</sup>, John Stover<sup>1</sup>, Lori Bollinger<sup>1</sup>, Nicolas Bacaër<sup>2</sup>, Brian Williams<sup>3</sup>

**1** Futures Institute, Glastonbury, Connecticut, USA

**2** IRD (Institut de Recherche pour le Developpement), Bondy, France

**3** SACEMA, DST/NRF Centre of Excellence in Epidemiological Modelling and Analysis, Stellenbosch University, Stellenbosch, South Africa

\* E-mail: cpretorius@futuresinstitute.org

## Mathematical model

The mathematical model underlying this analysis is a simple extension of the model developed and parameterized in [1]. Parameter descriptions for this model are given in table S1, while parameter values are listed in Tab. 1 [1]. Parameter description and values related to inclusion of PrEP in the model descriptions are given in table S2.

It consists of only a few compartments which are all structured by age. Throughout the index  $k$  refers either to females ( $k = f$ ) or to males ( $k = m$ ). Let:

- $S_k(t, x)$  be the susceptible population of sex  $k$  aged  $x$  ( $x \geq 1$ , age  $x$  corresponding to those people whose exact age is between  $x - 1$  and  $x$ ) at time  $t$  ( $t \geq t_0$ ).
- $P_k(t, x, y)$  be the HIV<sub>-</sub> population of sex  $k$  aged  $x$  at time  $t$  that have received PrEP for  $y$  years.
- $I'_k(t, x, y)$  be the population of sex  $k$  aged  $x$  at time  $t$  that has been HIV<sub>+</sub> for  $y$  years ( $1 \leq y \leq x$ ) who are infected and receiving PrEP.
- $I_k(t, x, y)$  be the population of sex  $k$  aged  $x$  at time  $t$  that has been HIV<sub>+</sub> for  $y$  years ( $1 \leq y \leq x$ ) who are not receiving ART or PrEP.
- $A_k(t, x, y)$  is the HIV<sub>+</sub> population of sex  $k$  aged  $x$  at time  $t$  that is receiving ART and that spent  $y$  years ( $1 \leq y < x$ ) infected but without treatment.
- $N_k(t, x) = S_k(t, x) + P_k(t, x) + I'_k(t, x) + I_k(t, x) + A_k(t, x)$  where, with a slight abuse of notation,

$$\begin{aligned} P_k(t, x) &= \sum_{y \leq x} P_k(t, x, y), & I'_k(t, x) &= \sum_{y \leq x} I'_k(t, x, y) \\ I_k(t, x) &= \sum_{y \leq x} I_k(t, x, y), & A_k(t, x) &= \sum_{y < x} A_k(t, x, y) \end{aligned}$$

Keeping the notations of [1], set  $J_k(t, x) = I_k(t, x) + \varepsilon \left( I'_k(t, x) + A_k(t, x) \right)$ . The force of infection is assumed to be

$$\begin{aligned} \lambda_f(t, x) &= 1 - \exp\left(-p_f (1 - c(t, x)) r(x) \sum_z s(x, z) J_m(t, z) / N_m(t, z)\right) \\ \lambda_m(t, x) &= 1 - \exp\left(-p_m \sum_z (1 - c(t, z)) r(z) s(z, x) J_f(t, z) / N_m(t, x)\right) \end{aligned}$$

for non PrEP users and

$$\begin{aligned}\lambda'_f(t, x) &= 1 - \exp\left(-p_f (1 - \varphi)(1 - c'(t, x)) r(x) \sum_z s(x, z) J_m(t, z)/N_m(t, z)\right) \\ \lambda'_m(t, x) &= 1 - \exp\left(-p_m \sum_z (1 - \varphi)(1 - c'(t, z)) r(z) s(z, x) J_f(t, z)/N_m(t, x)\right)\end{aligned}$$

for PrEP users. Let  $\theta'_k$  be the PrEP starting rate for people whose age is between  $x - 1$  and  $x$ . The ART starting rate is assumed to be

$$\theta(t, x, y) = h_2(t) \rho(x, y) \psi / (1 - \psi) + h_3(t) \tau \quad (1)$$

Notice that under the current ART program ( $h_2 = 1$  and  $h_3 = 0$ ), HIV<sub>+</sub> people are subject to two competing risks: the risk of dying at a rate  $\rho(x, y)$ , and the risk (the chance) of starting ART at a rate  $\rho(x, y) \psi / (1 - \psi)$ . Thus a fraction  $\psi$  starts ART.

The rate at which PrEP individuals start ART is assumed to be higher:

$$\theta^*(t, x, y) = \nu \theta(t, x, y) \nu > 1$$

to account for the likelihood that PrEP users will undergo regular screening and thus be more likely to enroll for ART.

Our assumptions regarding the initial condition  $t = t_0$  are as follows. For all  $1 \leq x \leq \omega$ , we assume that  $S_k(t_0, x) = N_k(t_0, x)$  except that  $S_m(t_0, x_0) = N_m(t_0, x_0) - 1$ . For all  $1 \leq y \leq x \leq \omega$ , we assume that  $I_k(t_0, x, y) = 0$  except that  $I_m(t_0, x_0, 1) = 1$ . Finally,  $A_k(t_0, x, y) = 0$  for all  $1 \leq y < x \leq \omega$ .

For  $t \geq t_0$  and  $1 \leq x \leq \omega - 1$ , the susceptible population is given by

$$\begin{aligned}S_k(t + 1, 1) &= b(t) (1 - \pi(t)), \\ S_k(t + 1, x + 1) &= (1 - \mu_k(x))(1 - \lambda_k(t, x))(1 - \theta'_k(t, x)) S_k(t, x) \\ &\quad + (1 - \mu_k(x)) (1 - \lambda'_k(t, x)) \phi' P_k(t, x)\end{aligned}$$

The PrEP receiving population is given for  $t \geq t_0$  and  $1 \leq y \leq x$  by

$$\begin{aligned}P_k(t + 1, x + 1, 1) &= (1 - \mu_k(x)) (1 - \lambda_k(t, x)) \theta'_k(t, x) S_k(t, x), \\ P_k(t + 1, x + 1, y + 1) &= (1 - \mu_k(x)) (1 - \lambda'_k(t, x)) (1 - \phi') P_k(t, x, y)\end{aligned}$$

The PrEP receiving population who are infected is given for  $t \geq t_0$  and  $1 \leq y \leq x \leq \omega - 1$  by

$$\begin{aligned}I'_k(t + 1, x + 1, 1) &= (1 - \mu_k(x)) \lambda'_k(t, x) (1 - \phi') P_k(t, x) \\ &\quad + (1 - \mu_k(x)) \lambda_k(t, x) \theta'_k(t, x) S_k(t, x) \\ I'_k(t + 1, x + 1, y + 1) &= (1 - \mu_k(x)) (1 - \rho(x, y)) (1 - \phi'_+) (1 - \theta^*(t, x, y)) I'_k(t, x, y)\end{aligned}$$

Here  $\phi'_+ \geq \phi$  is the rate at which HIV<sub>+</sub> PrEP users will discontinue PrEP use. The infected population without treatment is given for  $t \geq t_0$  and  $1 \leq y \leq x \leq \omega - 1$  by

$$\begin{aligned}I_k(t + 1, 1, 1) &= b(t) \pi(t), \\ I_k(t + 1, x + 1, 1) &= (1 - \mu_k(x)) \lambda_k(t, x) (1 - \theta'_k(x)) S_k(t, x), \\ &\quad + (1 - \mu_k(x)) \lambda'_k(t, x) \phi' P_k(t, x, y) \\ I_k(t + 1, x + 1, y + 1) &= (1 - \mu_k(x))(1 - \rho(x, y))(1 - \theta(t, x, y)) I_k(t, x, y) \\ &\quad + (1 - \mu_k(x)) \phi (1 - \sigma(y)) A_k(t, x, y) \\ &\quad + (1 - \mu_k(x))(1 - \rho(x, y)) \phi'_+ (1 - \theta^*(t, x, y)) I'_k(t, x, y)\end{aligned}$$

The ART-treated population is given for  $t \geq t_0$  and  $1 \leq y \leq x \leq \omega - 1$  by

$$\begin{aligned} A_k(t+1, x+1, y) = & (1 - \mu_k(x)) (1 - \phi) (1 - \sigma(y)) A_k(t, x, y) \\ & + (1 - \mu_k(x))(1 - \rho(x, y)) \theta(t, x, y) I_k(t, x, y) \\ & + (1 - \mu_k(x))(1 - \rho(x, y))(1 - \phi'_+) \theta^*(t, x, y) I'_k(t, x, y) \end{aligned}$$

setting  $A_k(t, 1, 1) = 0$  for all  $t$  for convenience.

## Acknowledgments

## References

1. Bacaer N, Pretorius C, Auvert B (2010) An age-structured model for the potential impact of generalized access to antiretrovirals on the South African HIV epidemic. Bull Math Biol doi:10.1007/s11538-010-9535-2.

## Tables

**Table 1.** Notations and parameter description. "M2C" stands for mother-to-child, "prob." for probability.

|               |                                              |
|---------------|----------------------------------------------|
| $k$           | sex (female or male)                         |
| $t_0$         | year of introduction of HIV                  |
| $t$           | time, $t \geq t_0$                           |
| $\omega$      | maximum age considered                       |
| $x$           | age, $1 \leq x \leq \omega$                  |
| $y$           | time since infection without ART             |
| $x_0$         | age of first infected woman                  |
| $b(t_0)$      | annual male (and female) births at $t = t_0$ |
| $p_f$         | HIV transmission prob. (man to woman)        |
| $p_m$         | HIV transmission prob. (woman to man)        |
| $q_0$         | M2C transmission prob.                       |
| $q_1$         | M2C transmission prob. with PMTCT            |
| $\varepsilon$ | relative infectiousness of people on ART     |
| $\phi$        | ART drop-out                                 |
| $\tau$        | annual proportion tested for HIV             |
| $N_k(t_0, x)$ | age pyramid at $t = t_0$                     |
| $\mu_k(x)$    | death rate if HIV <sub>-</sub>               |
| $b(t)/b(t_0)$ | changing birth rate                          |
| $\beta(x)$    | normalized female fertility                  |
| $u$           | under-reporting of male sexual partners      |
| $u r(x)$      | reported turnover of male sexual partners    |
| $s(x, y)$     | choice of male sexual partner                |
| $c(t, x)$     | condom use                                   |
| $\rho(x, y)$  | AIDS mortality                               |
| $\rho_1(y)$   | adult AIDS mortality                         |
| $\sigma(y)$   | mortality under ART                          |
| $h_1(t)$      | access to PMTCT                              |
| $h_2(t)$      | access to current ART program                |
| $h_3(t)$      | access to the "test and treat" strategy      |
| $\psi$        | proportion starting ART in current program   |

**Table 2.** Extension to notations and parameters used in [1]. PrEP parameters used in Section: “Universal PrEP and UTT: comparative impact”

|                                                         |                        |
|---------------------------------------------------------|------------------------|
| Notational parameters                                   |                        |
| $k$ : sex (female or male)                              | $f$ or $m$             |
| $t_0$ : year of introduction of HIV                     |                        |
| $t$ : time                                              | $t \geq t_0$           |
| $\omega$ : maximum age considered                       |                        |
| $x$ : age                                               | $1 \leq x \leq \omega$ |
| $y$ : disease duration                                  | $1 \leq y \leq \omega$ |
| PrEP sub-model                                          |                        |
| $\theta'_k$ : access to PrEP                            | 20% per year           |
| $\theta(t, x, y)$ : access to ART for non-PrEP users    | eq. 1                  |
| $\theta^* = \nu \theta$ : access to ART for PrEP users  | $\nu = 1.5$            |
| $\varphi$ : efficacy of PrEP                            | 90%                    |
| $\phi'$ : PrEP drop-out                                 | 1.5% per year          |
| $\phi'_+$ : PrEP discontinuation rate                   | 100% per year          |
| $c'_k(t, x)$ : condom substitution for those using PrEP | 0%                     |
